# Supplementary material
Source: PubMed Central journal article supplement (PMC8810606)
Supplement: NIHMS1758636-supplement-supinfo.pdf [file NIHMS1758636-supplement-supinfo.pdf]

## **Stage at diagnosis and survival among adolescents and young adults with lymphomas following the Affordable Care Act implementation in California**

Renata Abrahão, Julianne J.P. Cooley, Frances B. Maguire, Arti Parikh-Patel, Cyllene R. Morris, Eleonor Bimla Schwarz, Ted Wun, Theresa H.M. Keegan

### **Table of contents**

Supplemental Table S1: Stage at diagnosis among 11,337 AYAs with lymphomas, by ACA implementation period, California, 2005–2017

Supplemental Figure S1: Five-year survival by era of diagnosis among AYAs with: A. lymphomas (all patients), B. non-Hodgkin lymphoma, and C. Hodgkin lymphoma; California; 2005–2017. ACA: Affordable Care Act.

Supplemental Figure S2: Five-year survival by stage at diagnosis, among AYAs with: A. lymphomas (all patients), B. non-Hodgkin lymphoma, and C. Hodgkin lymphoma; California; 2005–2017.

**Supplemental Table S1: Stage at diagnosis among 11,337 AYAs with lymphomas, by ACA implementation period, California, 2005–2017.**

|                             |           | Total |      | Pre-ACA <sup>†</sup> |      | Early ACA <sup>‡</sup> |      | Full ACA <sup>§</sup> |      | <i>P</i> -value <sup>¶</sup> |
|-----------------------------|-----------|-------|------|----------------------|------|------------------------|------|-----------------------|------|------------------------------|
|                             |           | N     | %    | N                    | %    | N                      | %    | N                     | %    |                              |
| <b>Non-Hodgkin Lymphoma</b> | Stage I   | 1968  | 33.0 | 833                  | 33.2 | 471                    | 32.4 | 664                   | 33.3 | 0.033                        |
|                             | Stage II  | 1157  | 19.4 | 468                  | 18.7 | 289                    | 19.9 | 400                   | 20.0 |                              |
|                             | Stage III | 661   | 11.1 | 274                  | 10.9 | 167                    | 11.5 | 220                   | 11.0 |                              |
|                             | Stage IV  | 1700  | 28.5 | 747                  | 29.8 | 430                    | 29.6 | 523                   | 26.2 |                              |
|                             | Unknown   | 473   | 7.9  | 186                  | 7.4  | 98                     | 6.7  | 189                   | 9.5  |                              |
| <b>Hodgkin Lymphoma</b>     | Stage I   | 528   | 9.8  | 253                  | 10.3 | 137                    | 10.3 | 138                   | 8.7  | 0.212                        |
|                             | Stage II  | 2607  | 48.5 | 1211                 | 49.2 | 642                    | 48.3 | 754                   | 47.5 |                              |
|                             | Stage III | 1067  | 19.8 | 487                  | 19.8 | 271                    | 20.4 | 309                   | 19.5 |                              |
|                             | Stage IV  | 910   | 16.9 | 389                  | 15.8 | 219                    | 16.5 | 302                   | 19.0 |                              |
|                             | Unknown   | 266   | 4.9  | 120                  | 4.9  | 61                     | 4.6  | 85                    | 5.4  |                              |

Abbreviations: AYA, adolescent and young adult; ACA, Affordable Care Act.

<sup>†</sup> Pre-ACA: March 2005–September 2010, <sup>‡</sup>Early ACA: October 2010–December 2013, <sup>§</sup>Full ACA: 2014–2017

<sup>¶</sup>Chi-square *P*-value

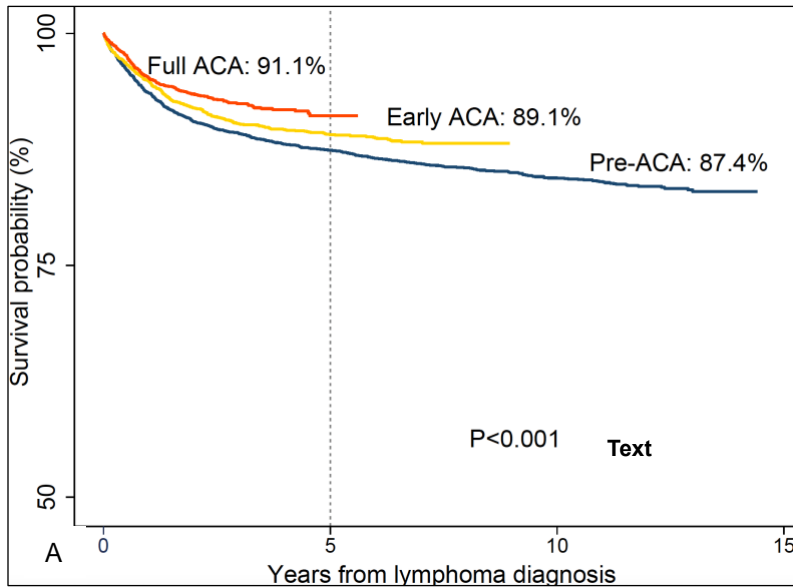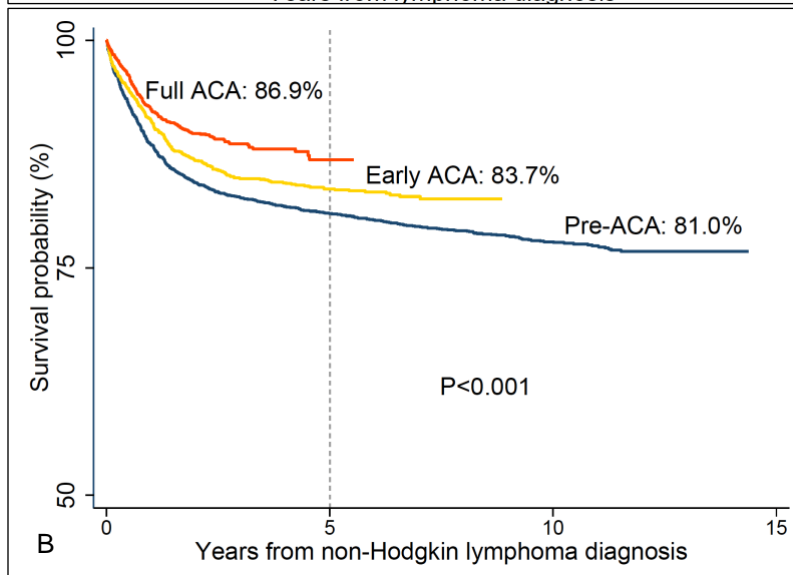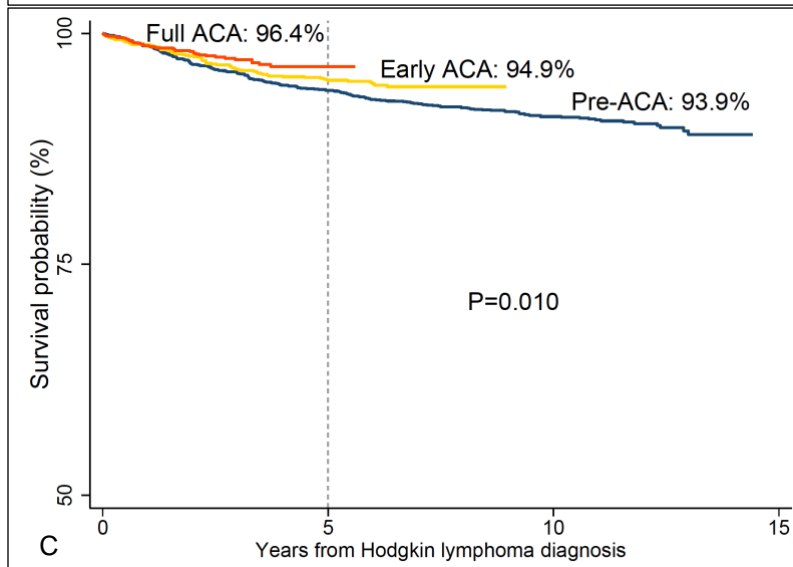

**Supplemental Figure S1: Five-year survival by era of diagnosis among adolescent and young adults with: A. lymphomas (all patients), B. non-Hodgkin lymphoma, and C. Hodgkin lymphoma; California; 2005–2017. ACA: Affordable Care Act.**

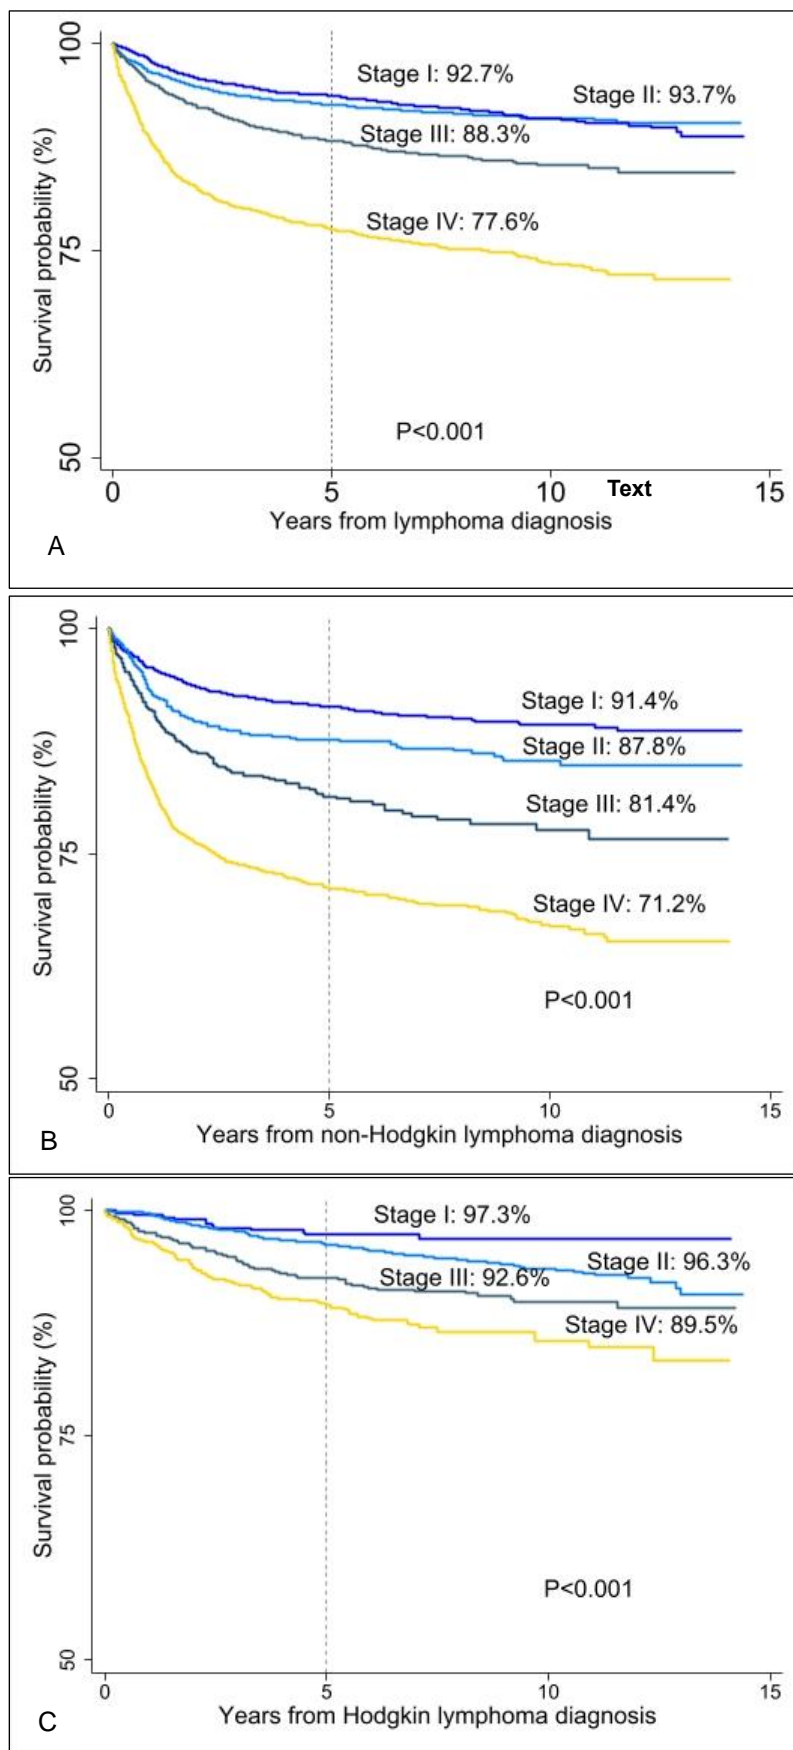

Supplemental Figure S2: Five-year survival by stage at diagnosis, among adolescents and young adults with: A. lymphomas (all patients), B. non-Hodgkin lymphoma, and C. Hodgkin lymphoma; California; 2005–2017.
